# Supplementary material for: Can ECIS Biosensor Technology Be Used to Measure the Cellular Responses of Glioblastoma Stem Cells?
Source: MDPI journal article supplement (doi:10.3390/bios11120498), 2021-12-06
Supplement: s1 [file s1]

Article

# Can ECIS Biosensor Technology Be Used to Measure the Cellular Responses of Glioblastoma Stem cells?

Laverne Diana Robilliard <sup>1,2,†</sup>, Jane Yu <sup>1,2,†</sup>, Sung-Min Jun <sup>1,2</sup>, Akshata Anchan <sup>1,2</sup>, Graeme Finlay <sup>1,3</sup>, Catherine E. Angel <sup>4</sup> and Euan Scott Graham <sup>1,2,\*</sup>

<sup>1</sup> Department of Molecular Medicine and Pathology, School of Medical Sciences, Faculty of Medical and Health Sciences, University of Auckland, Auckland 1025, North Island, New Zealand; l.robilliard@auckland.ac.nz (L.D.R.); jane.yu@auckland.ac.nz (J.Y.); sjun881@aucklanduni.ac.nz (S.-M.J.); a.anchan@auckland.ac.nz (A.A.); g.finlay@auckland.ac.nz (G.F.)

<sup>2</sup> Centre for Brain Research, University of Auckland, Auckland 1025, North Island, New Zealand

<sup>3</sup> Auckland Cancer Society Research Centre, Faculty of Medical and Health Sciences, University of Auckland, Auckland 1025, North Island, New Zealand

<sup>4</sup> School of Biological Sciences, Faculty of Science, University of Auckland, Auckland 1025, North Island, New Zealand; c.angel@auckland.ac.nz

\* Correspondence: s.graham@auckland.ac.nz

† These authors contributed equally to this work.

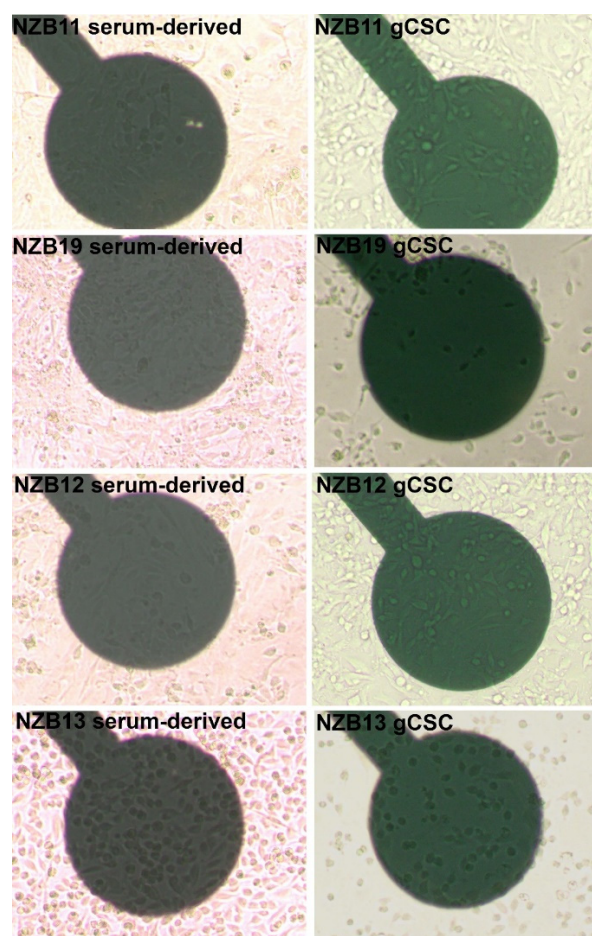

Figure S1 Serum-derived and gCSC cell resistance on 96W1E+ ECIS arrays. Phase contrast images of NZB11, NZB12, NZB19, and NZB13 serum-derived and gCSC cells after 60 h of growth on 96W1E+ ECIS arrays. Images acquired at 20× magnification. Data are representative of three independent replicates.
